# Supplementary material
Source: MDPI journal article supplement (https://www.mdpi.com/2071-1050/12/8/3131)
Supplement: s1 [file s1]

## Supplementary Materials

**Table S1** Bibliography of studies collected in the literature database

| Ecosystem services categories | Author/s                  | Paper Name                                                                                                                                                                                | Year of publication | Language             | No. of Paper |
|-------------------------------|---------------------------|-------------------------------------------------------------------------------------------------------------------------------------------------------------------------------------------|---------------------|----------------------|--------------|
| Water quality improvement     | SU Yunhua, Yang Tong      | Analysis of the Removal Effects of Nitrogen and Phosphorus on Reaping Wetland Plants in Autumn by Loushijiang Wetland as an Example                                                       | 2018                | Published in Chinese | 1            |
|                               | Yang Yongxing et al.      | Distribution characteristics and seasonal dynamics of N, P and K in wetland plants in upper shoal of Jiuduansha, Shanghai                                                                 | 2008                | Published in Chinese | 2            |
|                               | Liu change, Yang Yongxing | Characteristics of N, P and K cycling in Phragmites australis wetland ecosystem in Jiuduansha shoal of Shanghai                                                                           | 2008                | Published in Chinese | 3            |
|                               | Yang Yongxing et al.      | Characteristics of N, P and K cycling in Spartina alterniflora wetland ecosystem in Jiuduansha shoal of Yangtze River estuary                                                             | 2009                | Published in Chinese | 4            |
|                               | Yang Yongxing et al.      | Characteristics of N, P and K cycling in Scirpusmariqueter wetland ecosystem at Jiuduansha shoal of Yangtze River estuary                                                                 | 2009                | Published in Chinese | 5            |
|                               | Lin Peng, Lin Guanghui    | Studies on the mangrove ecosystem of the Jiulong Jiang River Estuary in China. The accumulation and biological cycle of nitrogen and phosphorus elements in the Kandelia candel community | 1985                | Published in Chinese | 6            |
|                               | Bai Junhong et al.        | Dynamic Changes of Nitrogen Contents and Nitrogen Cycling in Phragmites australis of Xianghai Marsh Wetland                                                                               | 2010                | Published in Chinese | 7            |
|                               | Li Li                     | Growth characteristics and roles of 11 species of wetland plants in polluted water purification                                                                                           | 2011                | Published in Chinese | 8            |
|                               | Chen Zhong                | Guangdong Province mangrove forest ecosystem purification function and its value appraisal                                                                                                | 2007                | Published in Chinese | 9            |
|                               | Yu Xiaoling et al.        | Adaptability of Mangrove Ecosystems and Their Role in Water Purification                                                                                                                  | 2009                | Published in Chinese | 10           |
|                               | Hu Jiannan                | Removal of nitrogen and phosphorus pollutant in aquaculture wastewater utilizing Suaeda salsa constructed wetlands and its underlying molecular mechanism                                 | 2018                | Published in Chinese | 12           |
|                               | Gao Feng, Li Chen         | Saline Municipal Wastewater Treatment by Constructed Mangrove Wetland                                                                                                                     | 2013                | Published in Chinese | 13           |
|                               | Yang Qiong et al.         | Purification efficiency of domestic wastewater by mangrove constructed wetlands                                                                                                           | 2014                | Published in Chinese | 14           |
|                               | Zhang Dexi                | Study on Purification Efficiency of Domestic Wastewater by Different Constructed Wetland Plants                                                                                           | 2018                | Published in Chinese | 15           |
|                               | Zhang Zhiyong et al.      | Removal Efficiencies of Nitrogen and Phosphorus by Three Mangrove Plants Under Freshwater                                                                                                 | 2013                | Published in Chinese | 16           |
|                               | Y. YE et al.              | Livestock wastewater treatment by a mangrove pot-cultivation system and the effect of salinity on the nutrient removal efficiency                                                         | 2001                | Published in English | 17           |
|                               | Zhuang Dachang            | Evaluation of the Indirect Use Values of the Wetland Resources in Dongting Lake                                                                                                           | 2005                | Published in Chinese | 18           |
|                               | Miao Shenyu et al.        | Allocation and circulation of phosphorus in artificial wastewater within a simulated mangrove wetland system                                                                              | 1999                | Published in Chinese | 19           |
|                               | Zhao Lina, et al.         | Comparison Among of Pollutant Removal Rates in Sewage by Several Wetland Plants in Spring Season                                                                                          | 2007                | Published in Chinese | 21           |
|                               | Chen Guizhu et al.        | Allocation, cycle and purged effects of nutrient pollutant N in artificial wastewater in simulated kandelia candel wetland system                                                         | 1996                | Published in Chinese | 23           |
|                               | He Tairong, Yang Yongxing | Accumulation and biological cycling of P and K in wetland communities in Sanjiang Plain                                                                                                   | 2006                | Published in Chinese | 24           |
|                               | Li Na                     | A study on the marine ecological effects of the coastal mangrove wetland in Guangdong                                                                                                     | 2014                | Published in Chinese | 25           |
|                               | Luo Huihua                | Study on the purifying effects and mechanism of domestic wastewater in Mangroves plants constructed wetland                                                                               | 2005                | Published in Chinese | 26           |

|                |                            |                                                                                                                                                                                    |      |                      |    |
|----------------|----------------------------|------------------------------------------------------------------------------------------------------------------------------------------------------------------------------------|------|----------------------|----|
|                | Xiong Yuanwu               | Research on the Interaction of Vegetation Succession and Nutrient Removal in Near Nature Restoring Wetlands                                                                        | 2017 | Published in Chinese | 27 |
|                | Zeng Wenjun                | The Effect of Sewage Purification of <i>Sonneratia apetala</i> and <i>Phragmites communis</i> wetland                                                                              | 2009 | Published in Chinese | 28 |
|                | Zeng Wenjun                | The Effect of Sewage Purification of <i>Sonneratia apetala</i> and <i>Phragmites communis</i> wetland                                                                              | 2009 | Published in Chinese | 28 |
|                | Gao Yunfang et al.         | Purification of Several Salt Marsh Plants to the Coastal Wetlands in the Estuary of Yellow River                                                                                   | 2010 | Published in Chinese | 29 |
|                | Chang Yajun et al.         | Effect of Suaeda glauca Purifying Seawater From Marinelands Varying in Eutrophication Degree.                                                                                      | 2017 | Published in Chinese | 30 |
|                | Pan Junbiao et al.         | Study of the Removal of Nitrogen and Phosphorus from the Eutrophic Marine Aquaculture Waters by Suaeda Glauca                                                                      | 2018 | Published in Chinese | 32 |
|                | Hu Jie et al.              | Restoration Effect of Combined Suaeda Salsa Floating Bed on Tail Water of Marine Culture                                                                                           | 2018 | Published in Chinese | 33 |
|                | Zhang Li                   | Purification effect and physiological and biochemical response of salt-tolerant plants on saline waste water                                                                       | 2013 | Published in Chinese | 34 |
|                | Liu Jianing                | Study on treatment mechanism of saline wastewater by halophytes constructed wetlands                                                                                               | 2016 | Published in Chinese | 35 |
| Carbon storage | Li Na                      | A study on the marine ecological effects of the coastal mangrove wetland in Guangdong                                                                                              | 2014 | Published in Chinese | 25 |
|                | Wei Yang et al.            | Trade-offs among ecosystem services in coastal wetlands under the effects of reclamation activities                                                                                | 2017 | Published in English | 36 |
|                | Mao Zilong                 | The Research on Land use/land cover change and Soil Organic Carbon Pool in Baicheng city during 1890-2029                                                                          | 2010 | Published in Chinese | 37 |
|                | Miao Zhenghong             | Changes and Factors of Soil Carbon Storage in the Sanjiang Plain, Northeast China from 1980s to 2010                                                                               | 2013 | Published in Chinese | 38 |
|                | Wang Zongming et al.       | Effects of Land Use/Cover Change on Net Primary Productivity of Sanjiang Plain, during 2000-2005                                                                                   | 2009 | Published in Chinese | 39 |
|                | Yuan Jia et al.            | Impact of Land Use/Cover Change on Regional Net Primary Productivity in Wanjia River City Belt During the Period from 2000 to 2010                                                 | 2016 | Published in Chinese | 40 |
|                | Xu Zhen et al.             | Changes of Vegetation Carbon Storage in Yancheng CoastalWetlands for Six Periods                                                                                                   | 2014 | Published in Chinese | 41 |
|                | Hao Cui                    | Research of land use and soil organic carbon dynamics in Binhai New Area of China                                                                                                  | 2012 | Published in Chinese | 42 |
|                | Yang Guoqiang              | Research of Estimation of Aboveground Biomass and Aboveground Carbon Storage for Tamarix in Changyi National Marine Ecological Special Protection Reserves Based on Remote Sensing | 2017 | Published in Chinese | 43 |
|                | Yan Ge                     | A Study on Saltmarsh Vegetation Biomass and Carbon Distribution in Chongming Dongtan Wetlands                                                                                      | 2014 | Published in Chinese | 44 |
|                | Mei Xueying, Zhang Xiufeng | Carbon storage and carbon fixation during the succession of natural vegetation in wetland ecosystem on east beach ofChongming Island                                               | 2007 | Published in Chinese | 45 |
|                | Yu Bing                    | The Effect of Land Use/Cover Change on Vegetation and Soil Carbon/Nitrogen Storage in Daqing Region                                                                                | 2010 | Published in Chinese | 46 |
|                | Xi Xiaohuan et al.         | Multi-purpose regional geochemical survey and soil carbon reserves problem: examples of Jiangsu, Henan, Sichuan, Jilin provinces and Inner Mongolia                                | 2008 | Published in Chinese | 47 |
|                | Zhang Surong et al.        | Distribution Characteristics of Soil Carbon Density and Carbon Reserve Estimation in the Plain Areas of Haihe River Basin                                                          | 2015 | Published in Chinese | 49 |
|                | Liu Gang                   | The Research on the Landscape Successions and the Carbon Storage of Hong-Hu Wetland in China                                                                                       | 2011 | Published in Chinese | 50 |
|                | Pan Baobao                 | Research on carbon storage of major aquatic plant communities                                                                                                                      | 2013 | Published in Chinese | 51 |
|                | Dong Hongfang et al.       | Spatial Distribution Characteristics of Organic Carbon in the Soil-Plant Systems in the Yellow River Estuary Tidal Flat Wetland                                                    | 2010 | Published in Chinese | 52 |
|                | Mou Xiaojie et al.         | Storage and Vertical Distribution Characteristics of Carbon and Nitrogen in Different Suaeda salsa Marsh Soils of the Yellow River Estuary                                         | 2012 | Published in Chinese | 53 |
|                | Zhang Xuliang et al.       | On the relation between carbon storage and reinforced fixation of the coastal wetland vegetation in the Yellow River delta area                                                    | 2012 | Published in Chinese | 54 |

|  |                        |                                                                                                                                                                      |      |                      |    |
|--|------------------------|----------------------------------------------------------------------------------------------------------------------------------------------------------------------|------|----------------------|----|
|  | Feng Zhongjiang et al. | The Environmental Interpretation for the Space Change of the Reed Biomass in the Yel low River Delta                                                                 | 2008 | Published in Chinese | 55 |
|  | Zhang Guiqin et al     | Wetland Resource of Jinan City Based on 3S Technique and Estimation of Its Carbon Sequestration                                                                      | 2011 | Published in Chinese | 56 |
|  | Li Jihong et al.       | Influence of Land Use on Carbon Storage Based on RS in Harbin                                                                                                        | 2018 | Published in Chinese | 57 |
|  | Wang Wei et al.        | Study on NPP Time-space Distribution Features of Poyang Lake Wetland Ecosystem in Jiangxi Province Based on RS and GIS                                               | 2015 | Published in Chinese | 58 |
|  | Wang Qidong            | Sedimentary records of environmental evolutions reflected by the radionuclides and organic carbon storage in the coastal wetlands of the northern Shandong peninsula | 2016 | Published in Chinese | 59 |
|  | Huo Lili               | The vertical distribution and stability of SOC in marsh before and after reclamation                                                                                 | 2013 | Published in Chinese | 60 |
|  | Wang Yongli            | Valuation of Ecosystem Services of the Yellow River Delta Coastal wetland Bases on Landscape                                                                         | 2012 | Published in Chinese | 61 |
|  | Yu Junbao et al.       | Estimation of Soil Organic Carbon Storage in CoastalWetlands of Modern Yellow River Delta based on Landscape Pattern                                                 | 2013 | Published in Chinese | 62 |
|  | Guo Xundong et al.     | Urban Land Use Pattern and Its Ecological Benefit from the Perspective of Carbon Storage                                                                             | 2017 | Published in Chinese | 63 |
|  | Chuai Xiaowei et al.   | Land Use Change and Its Influence on Carbon Storage of Terrestrial Ecosystems in Jiangsu Province                                                                    | 2011 | Published in Chinese | 64 |
|  | Zi Yuanyuan et al.     | Temporal and spatial distribution of soil organic carbon and its storage in the coastal wetlands of Jiaozhou Bay, China                                              | 2016 | Published in Chinese | 65 |
|  | Xie Linping et al.     | Distribution pattern and influencing factors of vegetation carbon storage of Tamarix chinense in the coastal wetland of Laizhou Bay, China.                          | 2017 | Published in Chinese | 66 |
|  | Zhao Rongqin et al.    | Carbon storage and fluxes of different land use types in Nanjing                                                                                                     | 2012 | Published in Chinese | 67 |
|  | Yu Quanzhou et al.     | Preliminary study on wetland vegetation carbon storage of Nansihu Lake in Shandong province                                                                          | 2011 | Published in Chinese | 68 |
|  | Wang Liwen et al.      | Variation analysis about net primary productivity of the wetland in Panjin region                                                                                    | 2012 | Published in Chinese | 69 |
|  | Hou Xuejing et al.     | Carbon storage capacity in the daguhe wetland, Jiaozhou Bay of Qingdao                                                                                               | 2012 | Published in Chinese | 70 |
|  | Guo Zhixing et al.     | Spatial Features of Productivity Variability of Marsh in the Sanjiang Plain                                                                                          | 2008 | Published in Chinese | 71 |
|  | Caolei                 | Carbon deposition and burial in typical coastal wetlands of the northern Shandong peninsula                                                                          | 2014 | Published in Chinese | 72 |
|  | Yu Quanzhou et al.     | Preliminary study in wetland vegetation and its carbon storage of Nansihu Lake in Shandong Province                                                                  | 2010 | Published in Chinese | 73 |
|  | Jiang Lanqi et al.     | Temporal and spatial variations of organic carbon and evaluation of carbon sequestration potential in the agricultural topsoil of the Songnen Plain                  | 2017 | Published in Chinese | 74 |
|  | Hu Pan                 | Carbon storage in the wetlands of Western Songnen Plain                                                                                                              | 2017 | Published in Chinese | 75 |
|  | Li Xuemei              | Changes of spatial distribution of soil organic carbon storage and land use from 1979 to 2013 in Tianjin Binhai New Area                                             | 2016 | Published in Chinese | 76 |
|  | Wang Shaoqiang         | The Effect of Land Cover Change on Carbon Cycle :A case Study in the Estuary of Yellow River Delta                                                                   | 2001 | Published in Chinese | 77 |
|  | Song Hongli            | Influence of reclamation activities on ecosystem type and carbon sink function of the coastal wetland in the Yellow River estuary                                    | 2015 | Published in Chinese | 78 |
|  | Ma Anna et al.         | Net Ecosystem Exchange of Carbon and Tidal Effects in Chongxi Wetland, Yangtze Estuary                                                                               | 2011 | Published in Chinese | 79 |
|  | Xu Zhen et al.         | Effects of land use changes on the organic carbon storage of the soil in Yancheng coastal wetlands                                                                   | 2014 | Published in Chinese | 80 |
|  | Shao Xuexin et al.     | Soil organic carbon content and its distribution pattern in Hangzhou Bay coastal wetlands                                                                            | 2011 | Published in Chinese | 81 |

|                      |                                                                                                                                                                         |      |                      |     |
|----------------------|-------------------------------------------------------------------------------------------------------------------------------------------------------------------------|------|----------------------|-----|
| Jia Ruixia et al.    | Organic Carbon Contents and Storages in the Salt Marsh Sediments in the MinRiver Estuary                                                                                | 2008 | Published in Chinese | 82  |
| Chmura G L et al.    | Global carbon sequestration in tidal, saline wetland soils                                                                                                              | 2003 | Published in English | 83  |
| Mei Xueying et al.   | Carbon storage and fixation by a typical wetland vegetation in Changjiang River Estuary - A case study of <i>Phragmites australis</i> in east beach of Chongming Island | 2008 | Published in Chinese | 89  |
| Li Bo et al.         | Carbon Storage and Fixation Function by <i>Phragmites australis</i> , a Typical Vegetation in Baiyangdian Lake                                                          | 2009 | Published in Chinese | 90  |
| Wu Qin et al.        | Distribution pattern of soil organic carbon in Poyang Lake wetland and related affecting factors                                                                        | 2012 | Published in Chinese | 91  |
| Xu Huanhuan et al.   | Study on Vertical Distribution and the Influencing Factors of Soil Organic Carbon in Ebinur Lake Wetland                                                                | 2010 | Published in Chinese | 92  |
| Chi Chuande et al.   | Storage and distribution of soil organic carbon in Shengjin Lake wetland, Anhui, China                                                                                  | 2006 | Published in Chinese | 93  |
| Kang Wenxing et al.  | Carbon Storage of the Wetland Vegetation Ecosystem and Its Distribution in Dongting Lake                                                                                | 2009 | Published in Chinese | 94  |
| Jiang Junyan et al.  | Soil organic carbon storage in tidal wetland and its relationships with soil physico-chemical factors: A case study of Dongtan of Chongming, Shanghai.                  | 2015 | Published in Chinese | 96  |
| Krull K. et al.      | Ecosystem development of a sandbar emergent tidal marsh, Altamaha River Estuary, Georgia, USA.                                                                          | 2009 | Published in English | 97  |
| Liao Xiaojuan et al. | Distribution Pattern of Soil Organic Carbon Contents in the Coastal Wetlands in Eastern Fujian                                                                          | 2013 | Published in Chinese | 98  |
| Suo Anning et al.    | Carbon storage and fixation by wetland vegetation at the estuaries in northern China :A case of Panjin area , Liaohe Delta                                              | 2010 | Published in Chinese | 99  |
| Suo Anning et al.    | Carbon storage and fixation by wetland vegetation at the estuaries in northern China :A case of Panjin area , Liaohe Delta                                              | 2010 | Published in Chinese | 99  |
| Huang Weijuan        | Study on Carbon Storage in Minjiang River Estuary                                                                                                                       | 2008 | Published in Chinese | 100 |
| Zheng Wenjiao et al. | Dynamics of carbon, hydrogen and nitrogen elements in <i>Rhizophora stylosa</i> mangrove community at Yinluo Bay of Guangxi, China.                                     | 1995 | Published in Chinese | 101 |
| Lin Peng et al.      | A study on the biomass and energy of mangrove communities in Shenzhen Bay                                                                                               | 1998 | Published in Chinese | 102 |
| Cao Qingxian         | The estimation of mangrove biomass and carbon storage using remote sensing data in Beibu Gulf coast                                                                     | 2010 | Published in Chinese | 103 |
| Xu Fanghong          | Carbon Storage of Three Natural Mangrove Forests in Gaoqiao, Zhanjiang                                                                                                  | 2012 | Published in Chinese | 104 |
| Kang Wenxing et al.  | CO <sub>2</sub> exchanges between mangrove- and shoal wetland ecosystems and atmosphere in Guangzhou                                                                    | 2008 | Published in Chinese | 105 |
| Yi Yi et al.         | Studies on biomass of <i>Avicennia marina</i> community of Guangxi                                                                                                      | 1993 | Published in Chinese | 106 |
| Lin Peng et al.      | The biomass and energy of <i>Avicennia marina</i> community in Tongyu of Xiamen, Fujian                                                                                 | 1995 | Published in Chinese | 107 |
| Lin Peng et al.      | Studies on mangrove ecosystem of Jiulongjing River Estuary in China I, the biomass and productivity of <i>Kandelia candel</i> community                                 | 1985 | Published in Chinese | 108 |
| Lin Peng et al.      | Biomass and productivity of <i>Bruguiera sexangula</i> mangrove forest in Hainan Island, China                                                                          | 1990 | Published in Chinese | 109 |
| Lin Peng et al.      | Biomass and productivity of <i>Rhizophora stylosa</i> community in Yingluo Bay of Guangxi, China                                                                        | 1992 | Published in Chinese | 110 |
| Lin Guanghui et al.  | Studies on energy in two mangrove communities, <i>Bruguiera sexangula</i> and <i>Kandelia candel</i> , in China                                                         | 1998 | Published in Chinese | 111 |
| Mao Zilong et al.    | Preliminary study on mangrove ecosystem carbon cycle of <i>Kandelia candel</i> in Futian nature reserve, Shenzhen, China                                                | 2012 | Published in Chinese | 112 |
| Xin Kun et al.       | Assessment of Ecological Functions of Mangrove Wetland in Dongzhai Port of Hainan                                                                                       | 2008 | Published in Chinese | 113 |
| Wen Yuanguang        | Biomass and Productivity of Five Mangrove Communities in Yingluo Bay of Guangxi                                                                                         | 1999 | Published in Chinese | 114 |

|                          |                                                                                                                                                                        |      |                      |     |
|--------------------------|------------------------------------------------------------------------------------------------------------------------------------------------------------------------|------|----------------------|-----|
| Jin Liang                | Carbon Storage and Fixation by <i>Kandelia candel</i> Mangrove in Jiulongjiang Estuary                                                                                 | 2013 | Published in Chinese | 115 |
| Wang Gang                | Distribution Characteristics of Biomass of Plants in Mangrove Forest along Latitude                                                                                    | 2016 | Published in Chinese | 116 |
| Ning S, Jiang Y, Deng Z. | A preliminary study on biomass of <i>Aegiceras corniculatum</i> natural forest in Longmen Islets of Guangxi                                                            | 1996 | Published in Chinese | 117 |
| Hai Ren et al.           | Biomass accumulation and carbon storage of four different aged <i>Sonneratia apetala</i> plantations in Southern China                                                 | 2010 | Published in English | 118 |
| Tam N F Y et al.         | Community structure and standing crop biomass of a mangrove forest in Futian Nature Reserve, Shenzhen China                                                            | 1995 | Published in English | 119 |
| Liao Baowen et al.       | Above2ground biomass and nutrient accumulation and distribution in different type <i>Sonneratia ca rseola</i> ris2 <i>Kandelia candel</i> mangrove plantations.        | 1999 | Published in Chinese | 120 |
| Chen Xuemei              | A study on synecology of mangrove at Daya Bay, China                                                                                                                   | 1998 | Published in Chinese | 121 |
| Zhu Yuanhui et al.       | Progress in Researches on Plant Biomass of Mangrove Forests                                                                                                            | 2014 | Published in Chinese | 122 |
| Wang Ren et al.          | Comparative Study on Biomass of the Natural <i>Kandeliacandel</i> Forest and Its Plantation in the Coastal Area of East Fujian Provinc                                 | 2010 | Published in Chinese | 123 |
| Wang Gang et al.         | Spatial patterns of biomass and soil attributes in an estuarine mangrove forest (Yingluo Bay, South China)                                                             | 2014 | Published in English | 124 |
| Sun Yudan et al.         | Community structure and vegetation carbon distribution of different mangrove forests                                                                                   | 2018 | Published in Chinese | 125 |
| Jiang Liuzhi et al.      | Remote Sensing Estimation of Carbon Storage of Mangrove Communities in Shenzhen City                                                                                   | 2018 | Published in Chinese | 126 |
| Li Meng                  | Carbon storage in the seagrass sediments of Guangxi, China                                                                                                             | 2018 | Published in Chinese | 127 |
| Gao Tianlun              | Carbon Storage and Influence Factors of Major Mangrove Communities in Fucheng, Leizhou Peninsula,Guangdong Province                                                    | 2018 | Published in Chinese | 128 |
| Ye Simin                 | The carbon density and its distribution of <i>K.obovata</i> in Quanzhou Bay estuarine wetland                                                                          | 2017 | Published in Chinese | 129 |
| He Qinfei et al.         | Carbon storage and distribution of mangroves at Qinzhou bay                                                                                                            | 2017 | Published in Chinese | 130 |
| Tan Siyong               | The organic carbon distribution characteristics of surface soil in southern China's mangrove wetlands and their influence factors                                      | 2017 | Published in Chinese | 131 |
| Huang Xing               | Responses of mangrove soil organic carbon and heavy metals to the change of mangrove landscape-a case study in Dongzhai Harbor, Hainan Island and Qinzhou Bay, Guangxi | 2017 | Published in Chinese | 132 |
| Wu Shijun et al.         | Aboveground biomass and carbon storage of <i>Aegiceras corniculatum</i> community of Luoyang mangrove in Quanzhou Bay estuary wetland                                  | 2017 | Published in Chinese | 133 |
| Peng Congjiao et al.     | Vegetation carbon stocks and net primary productivity of the mangrove forests in Shenzhen, China                                                                       | 2016 | Published in Chinese | 134 |
| Zhan Shaofen et al.      | Study of Soil Organic Carbon in Different Mangrove Communities                                                                                                         | 2015 | Published in Chinese | 135 |
| Huang Lingyu             | Distribution Characteristics and Influential Factors of Soil Organic Carbon in Mangrove Wetlands in Guangdong Provice                                                  | 2015 | Published in Chinese | 136 |
| Yan Kui                  | Carbon Storage and Evaluation of Mangrove Wetlands in Dongzhaigang, Hainan                                                                                             | 2015 | Published in Chinese | 137 |
| Zhang Yun                | Study on carbon storage of dominant vegetation and restoration in Sansha Bay                                                                                           | 2013 | Published in Chinese | 138 |
| Li Zhen                  | Distribution Characteristics of Soil Organic Carbon in Mangrove Wetlands in Hainan island                                                                              | 2013 | Published in Chinese | 139 |
| Tan Siyong et al.        | Study of surface sediments organic carbon in mangrove wetlands in Guangxi Province                                                                                     | 2017 | Published in Chinese | 140 |
| Lin Hui et al.           | Carbon density and allocation of <i>Bruguiera sexangula</i> and <i>Hibiscus tiliaceus</i> mangrove ecosystem in Qinglan harbor of Wenchang city, Hainan province       | 2015 | Published in Chinese | 141 |
| Zhang Li                 | Soil organic carbon in Mangrove Forests and its relationship with soil factor in Qinglangang, Hainan                                                                   | 2013 | Published in Chinese | 142 |

|                                                        |                      |                                                                                                                                                                                                                  |      |                      |      |
|--------------------------------------------------------|----------------------|------------------------------------------------------------------------------------------------------------------------------------------------------------------------------------------------------------------|------|----------------------|------|
|                                                        | Lin Hui et al.       | Carbon density and allocation of <i>Sonneratia alba</i> mangrove ecosystem in Qinglan Harbor of Hainan                                                                                                           | 2015 | Published in Chinese | 143  |
|                                                        | Hongxiao Liu et al.  | Carbon stocks and potential carbon storage in the mangrove forests of China                                                                                                                                      | 2014 | Published in English | 144  |
|                                                        | Yu Gao et al.        | Distribution patterns and controlling factors for the soil organic carbon in four mangrove forests of China                                                                                                      | 2019 | Published in English | 145  |
|                                                        | Jin-e Liu et al.     | Effects of exotic <i>Spartina alterniflora</i> on vertical soil organic carbon distribution and storage amount in coastal salt marshes in Jiangsu, China                                                         | 2017 | Published in English | 146  |
|                                                        | Yang Gao et al.      | New insight into global blue carbon estimation under human activity in land-sea interaction area: A case study of China                                                                                          | 2016 | Published in English | 147  |
|                                                        | Wei Chen et al.      | Soil carbon and nitrogen storage in recently restored and mature native <i>Scirpus</i> marshes in the Yangtze Estuary, China: Implications for restoration                                                       | 2017 | Published in English | 148  |
|                                                        | Ding Dongjing et al. | Evaluation on service value of coastal wetland ecosystem in Dongzhai harbor mangrove nature reserve                                                                                                              | 2016 | Published in Chinese | 149  |
|                                                        | Wen Yang et al.      | Soil organic carbon and nitrogen dynamics following <i>Spartina alterniflora</i> invasion in a coastal wetland of eastern China                                                                                  | 2017 | Published in English | 150  |
|                                                        | Liu Yu               | The Assessment of Carbon Storage of Vegetation Zones in the Jiuduan Shoal Wetland                                                                                                                                | 2013 | Published in Chinese | 151  |
| <b>Tourism and recreation, Sense of place, Habitat</b> | Wang Yongli          | Valuation of Ecosystem Services of the Yellow River Delta Coastal wetland Bases on Landscape                                                                                                                     | 2012 | Published in Chinese | 61   |
|                                                        | Xin Kun et al.       | Assessment of Ecological Functions of Mangrove Wetland in Dongzhai Port of Hainan                                                                                                                                | 2008 | Published in Chinese | 113  |
|                                                        | Ding Dongjing et al. | Evaluation on service value of coastal wetland ecosystem in Dongzhai harbor mangrove nature reserve                                                                                                              | 2016 | Published in Chinese | 149  |
|                                                        | Zhang Biao et al.    | The Key Ecological Services and Their Values of Wetland Ecosystems in Beijing                                                                                                                                    | 2017 | Published in Chinese | 152  |
|                                                        | Xiao Yanfang et al.  | Non-use value of wetland ecosystem in Beijing                                                                                                                                                                    | 2011 | Published in Chinese | 153  |
|                                                        | Xiao Duning et al.   | Study on landscape ecology of deltaic wetlands around Bohai Sea                                                                                                                                                  | 2001 | Published in Chinese | 154+ |
|                                                        | He Liping et al.     | The Valuation of Ecosystem Service Function of the Wetlands in Binhai New Area                                                                                                                                   | 2011 | Published in Chinese | 155  |
|                                                        | Tang Zhanpeng        | Ecosystem Services Value of Chaohu Wetland Restoration- An Empirical Study Based on the Threshold Regression Model                                                                                               | 2014 | Published in Chinese | 156  |
|                                                        | Yan Weiwei           | City park green space economic value of quantitative measurement research: Hangzhou Xixi Wetland National Park as an example                                                                                     | 2016 | Published in Chinese | 157  |
|                                                        | Zhang Liyun et al.   | Evaluation of Non-use Value of Dongting Lake Ecosystem                                                                                                                                                           | 2016 | Published in Chinese | 158  |
|                                                        | Wu Shujie et al.     | Evaluation of Non-use Value of mangrove in Guangxi                                                                                                                                                               | 2008 | Published in Chinese | 159  |
|                                                        | MAI Kuangyao         | Research on Wetland Ecosystem Services Value Evaluation in Hainan Dongzhaiguang                                                                                                                                  | 2014 | Published in Chinese | 160  |
|                                                        | Wang Guoxin et al.   | Changes of urban wetlands in Hangzhou and assessment of their ecosystem service values: a case study of West Lake and Xixi                                                                                       | 2010 | Published in Chinese | 161  |
|                                                        | Liu Fei              | Evaluation on Ecosystem Services in Nanhu Wetland of Huaibei City                                                                                                                                                | 2009 | Published in Chinese | 162  |
|                                                        | Xu Jianmin           | Study on evaluation and sustainable utilization of the wetlands in Yellow River Delta (Dongying)                                                                                                                 | 2001 | Published in Chinese | 163  |
|                                                        | Kang Xiaoming et al. | Biodiversity Maintenance Value Evaluation of Jilin Wetland Based on Contingent Valuation Method                                                                                                                  | 2015 | Published in Chinese | 164  |
|                                                        | Hao Linhua et al.    | Evaluation of the maintenance service values of the ecosystem diversity of marine protected areas and the diversity of important marine species in Sanya coastal waters based on the contingent valuation method | 2018 | Published in Chinese | 165  |

|                               |                       |                                                                                                                                                             |      |                      |      |
|-------------------------------|-----------------------|-------------------------------------------------------------------------------------------------------------------------------------------------------------|------|----------------------|------|
|                               | Pang Bingliang et al. | Valuation of the Services of Zhalong Wetland for Maintaining Biodiversity Based on Contingent Valuation Method                                              | 2014 | Published in Chinese | 166  |
|                               | Ma Zhanwu et al.      | Assessment on the Recreational Value of Zhalong Wetland Based on the CVM                                                                                    | 2014 | Published in Chinese | 167  |
|                               | Shang Haiyang         | Valuation on the wetland in north suburb of Zhangye city based on CVM                                                                                       | 2011 | Published in Chinese | 168  |
|                               | Wang Lixiao           | The Value Evaluation of Qinghai I Lake Wetland Ecological Tourism Based on GIS                                                                              | 2012 | Published in Chinese | 169  |
|                               | Yan Wei et al.        | The Recreation Value Evaluation of Jiangzhou Bay wetland based on TCM and CVM                                                                               | 2011 | Published in Chinese | 170  |
|                               | Yao Xiangshu et al.   | Willingness of the Local Farmers to Accept Ecological Compensation in Qilihai Wetland.                                                                      | 2017 | Published in Chinese | 171  |
|                               | Li Wei et al.         | Evaluation on the biodiversity maintenance service of Momoge wetland based on a double-bounded dichotomous method                                           | 2017 | Published in Chinese | 172  |
|                               | Song Hongli et al.    | Valuation of Ecosystem Economy in Shuangtai Estuary Wetland                                                                                                 | 2013 | Published in Chinese | 173  |
|                               | Gao Yuanjing          | Minjing estuary wetland ecosystem service function value evaluation                                                                                         | 2009 | Published in Chinese | 174  |
|                               | Xin Kun et al.        | Valuation of ecologic services of MaiPo marsh in Hong Kong                                                                                                  | 2006 | Published in Chinese | 175  |
|                               | Sun Baodi et al.      | Evaluation on the Biodiversity Maintenance Value of Wetlands in Yalu River Estuary                                                                          | 2017 | Published in Chinese | 176  |
| Price per unit                | Zhao Xinsheng et al.  | Analysis and Valuation of Water Quality Purification by Jilin Province Wetlands                                                                             | 2016 | Published in Chinese | 20   |
|                               | Cui Lijuan            | Evaluation on functions of Poyang Lake ecosystem                                                                                                            | 2004 | Published in Chinese | 22   |
|                               | Wang Yongli           | Valuation of Ecosystem Services of the Yellow River Delta Coastal wetland Bases on Landscape                                                                | 2012 | Published in Chinese | 61   |
|                               | Xin Kun et al.        | Assessment of Ecological Functions of Mangrove Wetland in Dongzhai Port of Hainan                                                                           | 2008 | Published in Chinese | 113  |
|                               | Yan Kui               | Carbon Storage and Evaluation of Mangrove Wetlands in Dongzhaigang, Hainan                                                                                  | 2015 | Published in Chinese | 137  |
|                               | Luo Xifang et al.     | Assessment of the Ecology Benefit Value of Coastal Protective Forest System in China                                                                        | 2013 | Published in Chinese | 149+ |
|                               | Zhang Biao et al.     | The Key Ecological Services and Their Values of Wetland Ecosystems in Beijing                                                                               | 2017 | Published in Chinese | 152  |
|                               | He Liping et al.      | The Valuation of Ecosystem Service Function of the Wetlands in Binhai New Area                                                                              | 2011 | Published in Chinese | 155  |
|                               | Wang Guoxin et al.    | Changes of urban wetlands in Hangzhou and assessment of their ecosystem service values: a case study of West Lake and Xixi                                  | 2010 | Published in Chinese | 161  |
|                               | Liu Fei               | Evaluation on Ecosystem Services in Nanhu Wetland of Huaibei City                                                                                           | 2009 | Published in Chinese | 162  |
|                               | Song Hongli et al.    | Valuation of Ecosystem Economy in Shuangtai Estuary Wetland                                                                                                 | 2013 | Published in Chinese | 173  |
|                               | Yi Xiaoqing et al.    | Estimation of wetland ecosystem service in Zhanjiang Mangrove National Nature Reserve                                                                       | 2018 | Published in Chinese | 177  |
|                               |                       | <a href="http://www.dongying.gov.cn/html/2015-11/content-15111708421614008.html">http://www.dongying.gov.cn/html/2015-11/content-15111708421614008.html</a> | 2015 | Published in Chinese | Web  |
|                               |                       | <a href="http://cerx.cn/dailynewsCN/index_209.htm">http://cerx.cn/dailynewsCN/index_209.htm</a>                                                             | 2015 | Published in Chinese | Web  |
| Land use area data of reserve | Lu Xia et al.         | Research on the land use/Cover change monitoring in Dafeng Elk Nature Reserve                                                                               | 2018 | Published in Chinese | 187  |
|                               | Yao Min et al.        | Research on ecological restoration measures in Dafeng Milu National Nature Reserve                                                                          | 2014 | Published in Chinese | 188  |
|                               | Huang Xia             | Application of Landscape Ecology on Nature Reserve — Taking the Design and plan for the David 's Deer Nature Reserve in Dafeng, Jiangsu as an example       | 2006 | Published in Chinese | 189  |
| Disaster resilience           | Xu Jianmin            | Study on evaluation and sustainable utilization of the wetlands in Yellow River Delta (Dongying)                                                            | 2001 | Published in Chinese | 163  |
|                               | Yi Xiaoqing et al.    | Estimation of wetland ecosystem service in Zhanjiang Mangrove National Nature Reserve                                                                       | 2018 | Published in Chinese | 177  |

|  |                              |                                                                                                               |      |                         |     |
|--|------------------------------|---------------------------------------------------------------------------------------------------------------|------|-------------------------|-----|
|  | Ledoux L<br>et al            | Valuing ocean and coastal resources: a review of practical examples and issues for further action             | 2002 | Published<br>in English | 181 |
|  | Han<br>Weidong               | The Ecological Values of Mangrove Ecosystems in China                                                         | 2000 | Published<br>in Chinese | 182 |
|  | Li Yi                        | Quantitative on comprehensive benefit of Guangdong coastal shelterbelt and implementation research            | 2010 | Published<br>in Chinese | 182 |
|  | Ge Fang et<br>al.            | Analyzing the Role of Salt Marshes on Attenuating Waves with Rb16-2050 Mesearues in Changjiang Estuary        | 2018 | Published<br>in Chinese | 183 |
|  | Chen Yujun<br>et al.         | Progresses in the Study of Wave Attenuation Effect of Mangroves                                               | 2011 | Published<br>in Chinese | 184 |
|  | Robert<br>Costanza et<br>al. | Changes in the global value of ecosystem services                                                             | 2014 | Published<br>in English | 185 |
|  | Fan<br>Hangqing              | An ecological pattern of sea dyke maintenance by mangroves and assessment of its benefits along Guangxi coast | 1995 | Published<br>in Chinese | 178 |
